# Supplementary material for: Automated Western immunoblotting detection of anti-SARS-CoV-2 serum antibodies
Source: Springer Nature journal article supplement (doi:10.1007/s10096-021-04203-8), 2021-03-03

a-

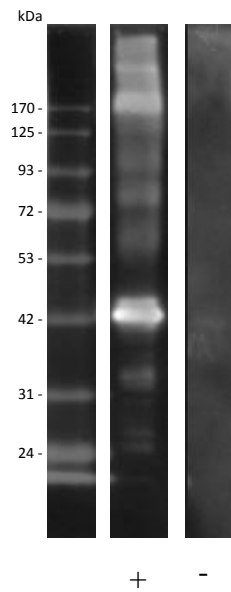

b-

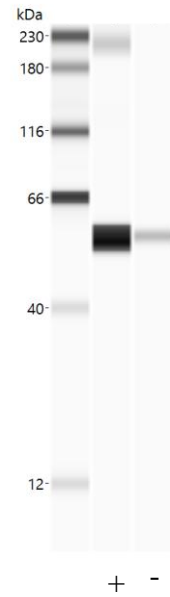

c-

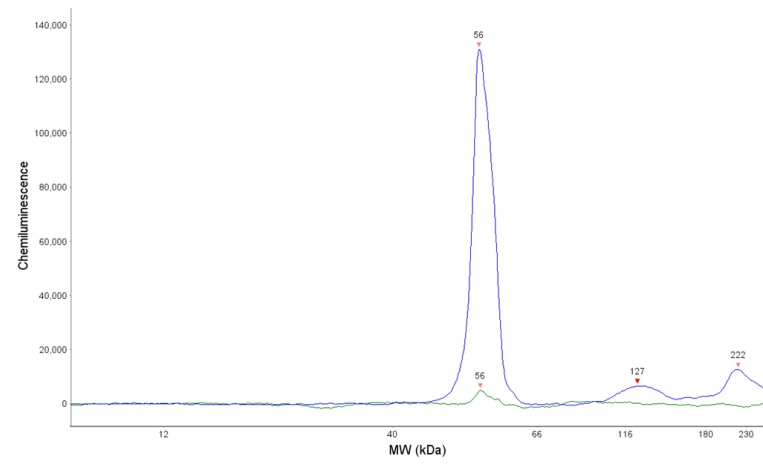

Supplement: MOESM1 [file 18925314]
